1 **Title of the article:**

2 Two structurally different oomycete MAMPs induce distinctive plant immune responses

3

4 **Authors:** Mohammad Shahjahan Monjil<sup>1,2</sup>, Hiroaki Kato<sup>3</sup>, Kentaro Matsuda<sup>1</sup>, Natsumi

5 Suzuki<sup>1</sup>, Shiho Tenhiro<sup>1</sup>, Maurizio Camagna<sup>1</sup>, Takamasa Suzuki<sup>4</sup>, Aiko Tanaka<sup>1</sup>, Ryohei

6 Terauchi<sup>3</sup>, Ikuo Sato<sup>1</sup>, Sotaro Chiba<sup>1</sup>, Kazuhito Kawakita<sup>1</sup>, Makoto Ojika<sup>1</sup> and Daigo

7 Takemoto<sup>1\*</sup>

8

9 **Affiliation:**

10 <sup>1</sup> Graduate School of Bioagricultural Sciences, Nagoya University, Nagoya, Aichi, 464-  
11 8601, Japan

12 <sup>2</sup> Department of Plant Pathology, Bangladesh Agricultural University, Mymensingh-  
13 2202, Bangladesh

14 <sup>3</sup> Graduate School of Agriculture, Kyoto University, Muko, Kyoto, 617-0001, Japan.

15 <sup>4</sup> College of Bioscience and Biotechnology, Chubu University, Kasugai, Aichi, 478-  
16 8501 Japan

17

18 **Corresponding author:** Daigo Takemoto

19 E-mail: [dtakemo@agr.nagoya-u.ac.jp](mailto:dtakemo@agr.nagoya-u.ac.jp), Telephone: +81 52 789 4029

20 Fax: +81 52 789 5525

21 Graduate School of Bioagricultural Sciences, Nagoya University, Chikusa, Nagoya,  
22 464-8601 Japan

23

24 **Number of figures:** 6 Figures and 27 Supplemental Figures.

25

26

27 **Abstract**

28 Plants recognize a variety of external signals and induce appropriate mechanisms to  
29 increase their tolerance to biotic and abiotic stresses. Precise recognition of attacking  
30 pathogens and induction of effective resistance mechanisms are critical functions for  
31 plant survival. Some molecular patterns unique to a certain group of microbes (MAMPs,  
32 microbe-associated molecular patterns) are sensed by plant cells as non-self molecules  
33 via pattern recognition receptors. While a variety of MAMPs of bacterial and fungal  
34 origin have been identified, reports on MAMPs of oomycete pathogens are relatively  
35 limited. This study aimed to identify unique MAMP elicitors from the oomycete  
36 pathogen *Phytophthora infestans*, the causal agent of potato late blight. Using reactive  
37 oxygen species (ROS) production and phytoalexin production in potato as markers for  
38 the purification of oomycete elicitors, we identified two structurally different groups of  
39 elicitors, namely ceramides and diacylglycerols. *P. infestans* ceramide (Pi-Cer) elicitors  
40 induced ROS production, while diacylglycerol (Pi-DAG) elicitors, containing  
41 eicosapentaenoic acid (EPA) as a substructure, induced the formation of phytoalexins in  
42 potato. Pi-Cer and Pi-DAG are also contained in the mycelia of another oomycete  
43 pathogen *Pythium aphanidermatum*, indicating that they are MAMPs of oomycetes.  
44 When Arabidopsis was treated with Pi-Cer and EPA, partially overlapping but different  
45 sets of genes were induced. Furthermore, simultaneous treatment with Pi-Cer and EPA  
46 did not have a cumulative effect on induced genes, but rather the expression of some  
47 genes induced by EPA was attenuated by the co-treatment with Pi-Cer. These results  
48 indicate that plants may combine the signals from simultaneously recognized MAMP  
49 elicitors to specifically adapt the defense response to a particular pathogen.

50

51 **Keywords:** Ceramide, EPA, MAMPs, Oomycete, Phytoalexins, *Phytophthora infestans*,  
52 ROS.

53

54 **Introduction**

55 During the course of their evolution, plants were always faced with the challenges of  
56 environmental microorganisms but have survived by developing physical barriers or  
57 inducible resistance strategies against pathogens. The first step of inducible plant  
58 defense against potential pathogens is the recognition of molecular patterns of microbes,  
59 referred to as MAMPs or PAMPs (microbe- or pathogen-associated molecular patterns).  
60 Plant cells recognize molecular patterns unique to a certain group of microbes as non-  
61 self molecules via pattern recognition receptors (PRRs) (Ranf, 2017). In Arabidopsis,  
62 for instance, chitin, a major component of the fungal cell wall, is recognized by a PRR  
63 complex containing LysM-RLK and co-receptor CERK1, while a conserved sequence  
64 of bacterial flagellin (flg22) and an elongation factor EF-Tu (elf18) induce plant defense  
65 via PRRs, FLS2 and EFR, respectively, in conjuncture with co-receptor BAK1 (Ranf,  
66 2017). While a variety of MAMPs of bacterial and fungal origin, as well as the  
67 mechanisms for their recognition in plants have been studied, reports for MAMPs of  
68 oomycete pathogens are relatively limited.

69 Oomycete plant pathogens resemble fungal pathogens in various aspects. Besides  
70 morphological similarities, such as filamentous hyphae, they are also able to form  
71 appressoria and haustoria during infection. These similarities are however merely the  
72 result of convergent evolution, since oomycetes are phylogenetically closely related to  
73 diatoms and brown algae (Stramenopiles), and only distantly related to fungi  
74 (Opisthokonta). Therefore, the natures of oomycetes and true fungi are rather different.  
75 For example, the somatic thallus of oomycetes is diploid, while it is haploid (or  
76 dikaryotic) for true fungi, and oomycetes have mitochondria with tubular cristae

77 whereas true fungi have flattened ones. More importantly in terms of interaction with  
78 plants, the composition of the cell wall and cell membrane of oomycete and fungi is  
79 distinctive. Although it varies from species to species, the fungal cell wall mainly  
80 contains  $\beta$ -1,3-glucan and chitin ( $\beta$ -1,4-N-acetylglucosamine) (Free, 2013), whereas the  
81 oomycete cell wall consists mainly of cellulose ( $\beta$ -1,4-glucan) and  $\beta$ -1,3-glucan  
82 (Mélida et al., 2013). The plasma membrane of oomycetes contains fucosterol as the  
83 end sterol, but ergosterol is the major end sterol for fungi (Gaulin et al., 2010).  
84 Consequently, plants may have distinct mechanisms to recognize oomycete and fungal  
85 pathogens to activate appropriate defense reactions.

86 Of the various oomycete genera, *Phytophthora*, *Pythium* and *Peronospora*  
87 */Hyaloperonospora* (downy mildew) are particularly noteworthy, as they include many  
88 species that are problematic plant pathogens (Kamoun et al., 2015). These plant  
89 pathogenic oomycete genera are predicted to have evolved from a common  
90 phytopathogenic ancestor species (Thines and Kamoun, 2010). Undoubtedly the most  
91 infamous representative of pathogenic oomycetes is *Phytophthora infestans*, the causal  
92 agent of potato late blight, which is responsible for the Great Famine in Ireland of the  
93 1840s. This pathogen is an ongoing problem even today, and the total costs for control  
94 efforts and yield losses by *P. infestans* are estimated in the range of multi-billion dollars  
95 annually (Garelik, 2002; Fry, 2008). Problems caused by *P. infestans* are particularly  
96 serious in developing countries where fungicides are used as the primary solution for  
97 disease management. Although potato cultivars with introduced resistance (*R*) gene(s)  
98 have been employed, due to selection pressure on these effectors in the pathogen

99 population, *R*-gene dependent resistances have been lost in many varieties (Forbes,  
100 2012).

101 In this study, we purified two structurally distinctive elicitors from *P. infestans*. Using  
102 induction of reactive oxygen species (ROS) production or phytoalexin production in  
103 potato as markers for the purification of elicitors, we identified two structurally different  
104 groups of elicitors, namely ceramides and diacylglycerols. *P. infestans* ceramide (Pi-  
105 Cer) elicitors induced ROS production, while diacylglycerol (Pi-DAG) elicitors,  
106 containing eicosapentaenoic acid (EPA) as a substructure, induced the formation of  
107 phytoalexins in potato tubers. RNAseq analysis was performed in Arabidopsis treated  
108 with Pi-Cer, EPA, or the mixture of both elicitors, to investigate the difference in the  
109 activity of the two elicitors on the induction of defense genes, and the effect of  
110 simultaneous recognition of two MAMP elicitors.

111

## 112 **RESULTS AND DISCUSSION**

### 113 **Purification of *Phytophthora infestans* elicitors which induce ROS production of** 114 **potato suspension-cultured cells**

115 Previously, we have reported that crude elicitor derived from the mycelia of *P.*  
116 *infestans* extracted by methanol (Pi-MEM) can induce the resistance reactions in potato  
117 (Monjil et al., 2015). Treatment with Pi-MEM can induce the ROS production in potato  
118 suspension cells and leaves, and production of sesquiterpenoid phytoalexins (rishitin,  
119 lubimin and oxylubimin) in potato tubers (Figure 1). To purify the elicitor molecules  
120 from the mycelia of *P. infestans* and determine their structure, Pi-MEM was first  
121 fractionated by its solubility in water and butanol. In this study, the lipophilic (butanol  
122 soluble) fraction was further separated by column chromatography, and the elicitor

123 fractions were selected using their ROS inducing activity in cultured potato cells  
124 (Supplemental Figure S1). Only fractions with clear elicitor activity were used for  
125 further purification processes. Six fractions with significant ROS-producing activity  
126 were further purified (Supplemental Figure S1) and the chemical structures of these  
127 elicitors were analyzed by NMR spectroscopy (Supplemental Figures S2, 3, 5, 6, 7 and  
128 9). To compare the structural difference between elicitors and inactive related  
129 substances, two fractions with no significant elicitor activity were also collected, and  
130 the structures of substances in these fractions were analyzed (Supplemental Figures S1,  
131 4 and 8). Further structural analyses (Supplemental Figures S10-16 and Supplemental  
132 document) showed that these eight substances could be divided into two groups,  
133 ceramide (Cer) and ceramide-phosphoethanolamine (CerPE). We designated the four  
134 ceramide compounds Pi-Cer A-D (*P. infestans* Ceramide) and the remaining four  
135 compounds Pi-CerPE A-D respectively. Except for the additional phosphoethanolamine  
136 in Pi-CerPE, compounds that share the same alphabetical suffix are otherwise  
137 structurally identical (Figure 2 and Supplemental Figure S17A). Pi-Cer A, B and D  
138 were able to induce ROS production, whereas Pi-Cer C had only a marginal ROS  
139 inducing activity (Figure 2 and Supplemental Figure S1). Similarly, Pi-CerPE A, B and  
140 D were active, whereas Pi-CerPE C was inactive (Supplemental Figures S1 and S17).  
141 For both Pi-Cers and Pi-CerPEs, D is the most active, followed by B and A in that order  
142 (Figure 2 and Supplemental Figure S17).

143 To investigate whether the substances corresponding to Pi-Cers are contained in  
144 another phytopathogenic oomycetes, a modified purification process was applied to  
145 partially purify the Pi-Cers from *Pythium aphanidermatum*. *Py. aphanidermatum* is an

146 oomycete plant pathogen with a wide host range, causing seedling damping-off, root  
147 and stem rots and blights of a wide range of important crops (e.g. tomato, soybean,  
148 cucumber and cotton). Although the composition of Pi-Cers was different from that in *P.*  
149 *infestans*, Pi-Cer A, B, C and D were detected in *Py. aphanidermatum*. On the other  
150 hand, Pi-Cers were not detected in several tested fungal plant pathogens, such as  
151 *Botrytis cinerea*, *Fusarium oxysporum* and *Colletotrichum orbiculare* (Supplemental  
152 Figure S18). These results suggest that the Pi-Cers are molecules specific to oomycetes.

153 The most evident structural difference between active Pi-Cers and Pi-Cer C is the  
154 8*E*,10*E*-double bonds and methyl-branching at C-9 in the sphingoid base, which are  
155 found in Pi-Cer A, B and D, but not in Pi-Cer C (Figure 2). Kato et al. (2021) showed  
156 that that 9-methyl branching and 4*E*-double bond structure of sphingoid base are  
157 important for its elicitor activity in Arabidopsis. Previously, cerebrosides were identified  
158 as elicitor molecules from rice blast pathogen, *Pyricularia oryzae* (Koga et al., 1998).  
159 Cerebroside elicitors isolated from *P. oryzae* also contain 9-methyl-branching and a 4*E*-  
160 double bond in the sphingoid base. Given that 9-methyl-branching in the sphingoid base  
161 is essentially not found in plants (Sperling and Heinz, 2003), this structure appears to be  
162 a molecular pattern that can be leveraged by the plant to recognize potentially  
163 pathogenic microorganisms. By mutagenesis of the Arabidopsis pWRKY33-LUC  
164 marker line and screening of mutants insensitive to Pi-Cer D, Kato et al. (2021)  
165 revealed a lectin receptor kinase is required for the recognition of Pi-Cer D (9-methyl  
166 sphingoid base) in Arabidopsis.

167

168 **Pi-Cer D and Pi-CerPE D are elicitors of ROS production in dicot and monocot**  
169 **plants**

170 Because Pi-Cer D and Pi-CerPE D had the highest elicitor activity among Pi-Cers  
171 and Pi-CerPEs, respectively, and were also more abundantly purified than the A and B  
172 type substances (Supplemental Figure S1), Pi-Cer D and Pi-CerPE D were mainly used  
173 in the following experiments. In potato suspension-cultured cells, ROS production  
174 induced by Pi-MEM peaks approx. 3 h after treatment. The same pattern was observed  
175 after Pi-Cer D and Pi-CerPE D treatment (Supplemental Figure S19), suggesting that  
176 Pi-Cers and Pi-CerPEs could be the major ROS inducing substances in Pi-MEM. Potato  
177 leaves were treated with Pi-Cer D, Pi-CerPE D or Pi-MEM by syringe infiltration and  
178 induction of ROS production was detected. ROS production was induced by these  
179 elicitors with a peak at approx. 12 h after the treatment. Similarly, ROS production was  
180 detected in leaves of *A. thaliana* and rice treated with Pi-Cer D or Pi-CerPE D 12 h after  
181 the treatment (Figure 3). These results indicated that Pi-Cer D and Pi-CerPE D are  
182 recognized by both dicot (potato, Arabidopsis) and monocot (rice) plants as MAMPs.

183

184 **Treatment of Pi-Cer D and Pi-CerPE D enhances the resistance of potato against *P.***  
185 ***infestans***

186 The effect of pre-treatment with ceramide elicitors on the resistance of potato against  
187 *P. infestans* was investigated (Figure 4). Potato leaves were treated with 10 µg/ml Pi-  
188 Cer D, Pi-CerPE D or 100 µg/ml Pi-MEM, and inoculated with a zoospore suspension  
189 of *P. infestans* at 24 h after the elicitor treatment. Within 3 days after the inoculation,  
190 leaves of the control plant showed water-soaked disease symptoms, and the lesions on



191 most leaves extended over the entire leaves within 7 days. In contrast, fewer and smaller  
192 spots were developed in leaves treated with Pi-Cer D, Pi-CerPE D or Pi-MEM.  
193 Evaluation of disease symptoms up to 7 days after the inoculation indicated that  
194 pretreatment with Pi-Cer D and Pi-CerPE D can enhance the resistance of potato leaves  
195 against *P. infestans* (Figure 4). Inoculated leaves were stained with aniline blue to  
196 visualize the penetration of *P. infestans* as fluorescent spots of deposited callose beneath  
197 the penetration sites at 24 h after the inoculation. Compared with control leaves, fewer  
198 fluorescence spots were detected in leaves pretreated with Pi-Cer D, Pi-CerPE D or Pi-  
199 MEM elicitors (Figure 4D), which indicates that Pi-Cer D and Pi-CerPE D can enhance  
200 the penetration resistance of potato leaves against *P. infestans*.

201

## 202 **Isolation of Pi-DAGs as elicitors for the induction of phytoalexins production in** 203 **potato tuber**

204 In potato tubers, accumulation of phytoalexins (rishitin, lubimin and oxylubimin) was  
205 induced by the treatment with the Pi-MEM (Figure 1). However, treatment of Pi-Cers or  
206 Pi-CerPEs did not induce the production of phytoalexins in potato tubers (Supplemental  
207 Figure S20), which suggested that Pi-MEM includes one or more additional elicitors  
208 that can induce phytoalexin production. The initial step of our purification protocol  
209 consisted of fractioning the butanol-soluble compounds via silica gel flash column  
210 chromatography, yielding eight fractions. Of these eight fractions, the third (RM-I-130-  
211 3) and sixth (RM-I-130-6) fraction had shown ROS inducing activity and were used for  
212 the isolation of Pi-Cers and Pi-CerPEs (Supplemental Figures S1 and 21). The same  
213 eight fractions were now used to evaluate their ability to induce phytoalexin production

214 in potato tubers. Substantial elicitor activity was only observed in the first fraction  
215 (RM-I-130-1) and it was therefore further purified (Supplemental Figure S21). Among  
216 the five fractions obtained from the following flash column chromatography, the third  
217 (ST-I-8-3) and fourth (ST-I-8-4) fraction showed elicitor activity that resulted in  
218 phytoalexin production. These fractions were later found to contain mainly 1,3-DAG  
219 (diacylglycerol) and 1,2-DAG, respectively. Both ST-I-8-3 and -4 were further  
220 separated by HPLC using an ODS column and at least 5 out of 9 resultant fractions  
221 showed elicitor activity (Supplemental Figure S21). These results indicated that several  
222 1,3- and 1,2-DAGs derived from *P. infestans* are elicitors that can induce the  
223 phytoalexin production of potato tubers. Two fractions with relatively higher elicitor  
224 activity, yield and purity, ST-I-14-4 and ST-I-23-4, were selected for further structural  
225 analyses. Two additional fractions, which showed almost no elicitor activity (ST-I-14-8  
226 and ST-I-23-8), were also subjected for structural analyses in order to narrow down the  
227 molecular patterns that may be critical for the elicitor activity. Further structural  
228 analyses (Supplemental Figures S22-25) revealed that active substances from ST-I-14-4  
229 and ST-I-23-4 were 1,2- and 1,3-DAG which both contained an eicosapentaenoic acid  
230 (EPA) and linoleic acid fatty acid chain each, and were designated as Pi-DAG A and B,  
231 respectively (Figure 5 and Supplemental Figure S21). The inactive substances in ST-I-  
232 14-8 and ST-I-23-8 were found to be 1,2- and 1,3-DAG containing palmitic acid and  
233 linoleic acid as fatty acid chains, and were designated as Pi-DAG C and D, respectively.  
234 Pi-DAG A and B, as well as Pi-DAG C and D, are also contained in *Py.*  
235 *aphanidermatum*, suggesting that Pi-DAGs are molecules commonly found in oomycete  
236 plant pathogens (Supplemental Figure S26).

237 Based on the structural difference of active and inactive Pi-DAGs (Figure 5A and B),  
238 EPA was expected to be the essential structure for the elicitor activity of Pi-DAG A and  
239 B. Consistently, EPA from *P. infestans* has previously been identified as an elicitor  
240 molecule (Bostock et al., 1981). EPA can be considered as a MAMP of oomycete, as  
241 EPA is not found in higher plants and higher fungi, but an essential component of the  
242 plasma membrane of oomycete cells (Bostock et al., 2011). We confirmed that EPA, but  
243 not Pi-Cer D, can induce the production of phytoalexins in potato tubers (Figure 5C and  
244 D). On the contrary, Pi-Cer D, but not EPA, induced ROS production in potato leaves  
245 (Supplemental Figure S27), thus indicating that the structurally different oomycete  
246 MAMPs, EPA and Pi-Cer D, induce distinctive plant immune responses.

247

#### 248 **RNAseq analysis of Arabidopsis treated with EPA, Pi-Cer D or a mixture of EPA** 249 **and Pi-Cer D**

250 To compare the elicitor activity of EPA and Pi-Cer D in Arabidopsis, an Arabidopsis  
251 transformant containing a *LUC* transgene under the control of *WRKY33* (AT2G38470)  
252 promoter (pWRKY33-LUC) (Kato et al., 2021) was treated with EPA and Pi-Cer D.  
253 While Pi-Cer D can induce the activation of the *WRKY33* promoter, only marginal  
254 induction of *WRKY33* promoter was detected by the treatment with EPA (Figure 6A).  
255 RNAseq analysis was performed for Arabidopsis seedlings 24 h after the treatment with  
256 20 µg/ml EPA, Pi-Cer D or a mixture of 20 µg/ml EPA and 20 µg/ml Pi-Cer D.  
257 Clustering analysis of significantly up- or down-regulated genes revealed that treatment  
258 with EPA or Pi-Cer D leads to distinct gene expression patterns. While some genes  
259 respond similarly to either treatment, others genes are induced exclusively by only one

260 of the two treatments (Figure 6B). Furthermore, simultaneous treatment with Pi-Cer D  
261 and EPA did not result in an expression pattern that would be expected by the mere  
262 combination of either treatment. Instead, the expression of some genes induced by EPA  
263 was attenuated by the co-treatment with Pi-Cer D, resulting in an expression pattern  
264 different from either single treatment (Figure 6B). These results indicate that plants may  
265 combine the signals from simultaneously recognized MAMP elicitors to specifically  
266 adapt the defense response to a particular pathogen. Insight into how these elicitor  
267 signals are processed, as well as how the response pathways of both elicitors affect one  
268 another, will require further analysis. RNAseq analyses of potato and Arabidopsis  
269 treated either with single, or simultaneous treatments of EPA and Pi-Cer D at different  
270 time points should allow a better understanding of how these elicitors function.

271

## 272 **MATERIALS AND METHODS**

### 273 **Biological materials, growth conditions and inoculation**

274 Potato suspension-cultured cells were prepared from calluses induced from potato  
275 tuber discs (cv. Sayaka carrying the *R1* and *R3* genes) in callus-inducing medium [1 ml/l  
276 B5-vitamin (100 g/l Myo-inositol, 2.5 g/l glycine, 500 mg/l thiamine-HCl, 500 mg/l  
277 pyridoxine-HCl, 5 g/l nicotinic acid, 50 mg/l biotin, 50 mg/l folic acid), 2 mg/l NAA,  
278 0.5 mg/l kinetin, 3% sucrose, 0.2% phytigel and Murashige-Skoog basal medium],  
279 under dark condition. Suspension-cultured potato cells were grown by agitation at 130  
280 rpm, 23°C in 95 ml of MS medium supplemented with 30 mg/ml sucrose, 1 mg/l  
281 thiamine, 100 mg/l myo-inositol, 200 mg/l  $\text{KH}_2\text{PO}_4$ , and 0.2 mg/l 2,4-  
282 dichlorophenoxyacetic acid. Cells were sub-cultured every week and used for

283 experiments 4-5 days after the subculturing. Potato, rice and Arabidopsis (Col-0) plants  
284 were grown at 23-25°C under a 16 h photoperiod and an 8 h dark period in an  
285 environmentally controlled growth room. Tubers of potato (cv. Rishiri) carrying the *RI*  
286 gene were stored at 4°C until use. *P. infestans* isolate 08YD1 and PI1234-1 (Shibata et  
287 al., 2011) was maintained on rye-media at 10°C. Inoculation of potato leaves with a  
288 zoospore suspension of *P. infestans* was performed as described previously (Shibata et  
289 al., 2010). *Pythium aphanidermatum* strain Pyaph isolated from cucumber, *Botrytis*  
290 *cinerea* strain AI18 isolated from strawberry leaves in Mie Prefecture in 2018,  
291 *Fusarium oxysporum* f. sp. *melonis* strain Mel02010 (Namiki et al., 1998) and  
292 *Colletotrichum orbiculare* strain 104-T (Ishida and Akai 1969) were grown on potato  
293 dextrose agar (PDA) at 25°C and maintained at -80°C in 20% glycerol.

294

#### 295 **Preparation of methanol extract of *Phytophthora infestans* mycelia (Pi-MEM)**

296 The *Phytophthora infestans* isolates PI1234-1 were grown on rye-seed extract agar  
297 medium in test tubes at 18°C in dark condition for 2 weeks. Parts of the growing  
298 mycelia were placed in 100 ml flasks containing 20 ml of rye liquid nutrient medium of  
299 rye seed-extract (60 g rye seed), 20 g of sucrose and 2 g of yeast extract per 1 liter and  
300 incubated in the dark for 2 weeks at 18°C to allow the growth of the mycelia. The  
301 mycelial mats grown in the liquid medium were washed thoroughly with water. To  
302 remove excess water, water was filtered through filter paper (Toyoroshi No. 2) under  
303 reduced pressure and the tissue then frozen at -20°C. The collected mycelia of *P.*  
304 *infestans* were ground in liquid nitrogen by mortar and pestle. The ground mycelia were  
305 transferred to a 50 ml tube containing methanol (10 ml/g mycelia). The mycelia

306 suspension was finely grounded using a polytron type homogenizer (HG30, Hitachi  
307 Koki, Japan) for 2 min. After centrifugation at 4°C, 3000 × g for 30 min, the supernatant  
308 was collected and dried using an evaporator and used as Pi-MEM elicitor. Further  
309 procedures for the purification of Pi-Cer and Pi-DAG from Pi-MEM are described in  
310 the supplemental document. Mycelia of *Pythium aphanidermatum*, *Botrytis cinerea*,  
311 *Fusarium oxysporum* f. sp. *melonis* and *Colletotrichum orbiculare* were grown in 50 ml  
312 of potato dextrose broth (PDB) in 100 ml flasks at 25°C with gentle shaking.

313

#### 314 **Measurement of ROS production in potato suspension-cultured cells**

315 The relative intensity of ROS generation in potato suspension-cultured cells was  
316 measured by counting photons from L-012-mediated chemiluminescence. The potato  
317 suspension-cultured cells (50 mg/ml) were washed with the assay buffer (175 mM  
318 mannitol, 50 mM MES-KOH, 0.5 mM CaCl<sub>2</sub> and 0.5 mM K<sub>2</sub>SO<sub>4</sub>, pH 5.7) twice for  
319 removal of the liquid culture medium. For the detection of ROS produced in cultured  
320 cells, the cells were resuspended in assay buffer, equilibrated for 1 h at 100 rpm at 23°C.  
321 Cells were then treated with elicitors and incubated under the same condition for 3 h.  
322 After the incubation, chemiluminescence was measured using 20 mM L-012 (Wako  
323 Pure Chemical, Osaka, Japan) in a multimode microplate reader Mithras LB940  
324 (Berthold Technologies, Bad Wildbad, Germany).

325

#### 326 **Measurement of ROS production in plant leaves**

327 The relative intensity of ROS production was determined by counting photons from  
328 L-012-mediated chemiluminescence. To detect the ROS production in potato,

329 Arabidopsis and rice leaves, 0.5 mM L-012 in 10 mM MOPS-KOH (pH 7.4) was  
330 allowed to infiltrate to the intercellular space of leaves. For potato and Arabidopsis, a  
331 syringe without a needle was used for leaf infiltration, whereas vacuum infiltration was  
332 used for rice. Chemiluminescence was monitored using a photon image processor  
333 equipped with a sensitive CCD camera in the dark chamber at 20°C (Aquacosmos 2.5;  
334 Hamamatsu Photonics, Shizuoka, Japan) and quantified using the U7501 program  
335 (Hamamatsu Photonics). For the data shown in Supplemental Fig. S27,  
336 chemiluminescence was monitored using Lumino Graph II EM (ATTO, Tokyo, Japan).

337

#### 338 **Detection of potato phytoalexins by thin-layer chromatography (TLC)**

339 Potato phytoalexins, exuded from potato tissue, were extracted with ethyl acetate as  
340 described previously (Noritake et al., 1996). The extract was separated on TLC plates  
341 (TLC aluminum sheet of silica gel 60, Merck, Whitehouse Station, NJ, USA), which  
342 were developed with cyclohexane:ethyl acetate (1:1, v/v) and visualized by spraying  
343 with sulfuric acid containing 0.5% vanillin followed by heating at 120°C.

344

#### 345 **Detection of potato phytoalexins by liquid chromatography/mass spectrometry** 346 **(LC/MS)**

347 Potato tuber discs (2 cm in diameter and approx. 4 mm thick) were prepared and  
348 incubated in a humidified chamber in dark at 23°C for 24 h before treatment with  
349 elicitors. The upper side of incubated potato tubers was then treated with 100 µl of  
350 elicitor solution and further incubated at 23°C in the dark for 48 h before the extraction  
351 of phytoalexins. Four tuber disks/sample were immersed in 5 ml of ethyl acetate and

352 shaken for 1 h, then the organic solvent was collected and evaporated. The residual  
353 material was redissolved in 100  $\mu$ l of 50% (v/v) acetonitrile and 2  $\mu$ l was injected for  
354 the analysis with LC/MS (Accurate-Mass Q-TOF LC/MS 6520, Agilent Technologies,  
355 Santa Clara, CA, USA).

356

### 357 **Measuring the activation of *AtWRKY33* promoter and RNA-seq analysis**

358 Seeds of Arabidopsis containing *Luciferase* marker gene under the control of  
359 *AtWRKY33* (AT2G38470) promoter (Kato et al., 2021) were surface sterilized with 3%  
360 hydrogen peroxide and 50 % ethanol for 1 min with gentle shaking, washed with  
361 sterilized water, and then individual sterilized seeds were placed in separate wells of a  
362 96 microwell plate containing 150  $\mu$ l of Murashige and Skoog (MS) liquid medium (1/2  
363 MS salts, 0.05% [w/v] MES, 0.5% [w/v] Sucrose, adjusted to pH 5.8 with NaOH) with  
364 50  $\mu$ M D-Luciferin potassium salt (Biosynth Carbosynth, Compton, UK), covered with  
365 a clear plastic cover. Plates containing Arabidopsis seeds were then incubated in a  
366 growth chamber for approx. 12 days at 23°C with 24 h light. After the treatment of  
367 elicitors, chemiluminescence intensity derived from expressed luciferase was measured  
368 using Mithras LB940 (Berthold) for 12 h. Total RNA was extracted from 6  
369 seedlings/sample of 10-days old Arabidopsis 24 h after the treatment with elicitors using  
370 the RNeasy Plant Mini Kit (QIAGEN, Hilden, Germany). Libraries were constructed  
371 using KAPA mRNA Capture Kit (Roche, Basel, Switzerland) and MGIEasy RNA  
372 Directional Library Prep Set (MGI, Shenzhen, China), and sequenced on DNBSEQ-  
373 G400RS (MGI) with 150 bp paired-end protocol. The RNA-seq reads were filtered using  
374 trim-galore v.0.6.6 (Martin, 2011, bioinformatics.babraham.ac.uk) and mapped to the



375 Arabidopsis genome (TAIR 10.1; RefSeq: GCF\_000001735.4) using HISAT2 v.2.2.1  
376 (Kim et al., 2019) and assembled via StringTie v.2.1.7 (Kovaka et al., 2019). Significant  
377 differential expression was determined using DESeq2 v.1.32.0 (Love et al., 2014). All  
378 software used during RNA-seq analysis was run with default settings. The expression  
379 profile was calculated from the log<sub>2</sub>-fold expressions using the clustermap function  
380 from seaborn v. 0.11.1 (Waskom, 2021).

381

## 382 **ACKNOWLEDGMENTS**

383 We thank Ms. Kayo Shirai (Hokkaido Central Agricultural Experiment Station, Japan)  
384 and Dr. Seishi Akino (Hokkaido University, Japan) for providing *P. infestans* isolate, Dr.  
385 Kenji Asano and Mr. Seiji Tamiya (National Agricultural Research Center for Hokkaido  
386 Region, Japan) and Mr. Yasuki Tahara (Nagoya University, Japan) for providing tubers  
387 of potato cultivars. We also thank Dr. Masaharu Kubota (National Agriculture and Food  
388 Research Organization, Japan) for providing *Pythium aphanidermatum* strain, Prof.  
389 Takashi Tsuge (Chubu University, Japan) for providing *Fusarium oxysporum* strain and  
390 Prof. Yoshitaka Takano (Kyoto University, Japan) for providing *Colletotrichum*  
391 *orbiculare* strain. This work was supported by a Grant-in-Aid for Scientific Research  
392 (B) (17H03771 and 20H02985) to DT and (17H03963) to KK from the Japan Society  
393 for the Promotion of Science.

394

## 395 **SUPPLEMENTAL DATA**

396 **Supplemental Figure S1.** Purification procedure of *Phytophthora infestans* ceramide  
397 (Pi-Cer) and ceramide phosphoethanolamine (Pi-CerPE) elicitors.

- 398 **Supplemental Figure S2.** NMR spectra of Pi-Cer A (CDCl<sub>3</sub>, 400 MHz for <sup>1</sup>H, 100  
399 MHz for <sup>13</sup>C).
- 400 **Supplemental Figure S3.** NMR spectra of Pi-Cer B (CDCl<sub>3</sub>, 600 MHz for <sup>1</sup>H, 150  
401 MHz for <sup>13</sup>C).
- 402 **Supplemental Figure S4.** NMR spectra of Pi-Cer C (CDCl<sub>3</sub>, 400 MHz for <sup>1</sup>H, 100  
403 MHz for <sup>13</sup>C).
- 404 **Supplemental Figure S5.** NMR spectra of Pi-Cer D (CDCl<sub>3</sub>, 600 MHz for <sup>1</sup>H, 150  
405 MHz for <sup>13</sup>C).
- 406 **Supplemental Figure S6.** NMR spectra of Pi-CerPE A (CDCl<sub>3</sub>-CD<sub>3</sub>OD 4:1, 400 MHz  
407 for <sup>1</sup>H, 100 MHz for <sup>13</sup>C).
- 408 **Supplemental Figure S7.** NMR spectra of Pi-CerPE B (CDCl<sub>3</sub>-CD<sub>3</sub>OD 4:1, 600 MHz  
409 for <sup>1</sup>H, 150 MHz for <sup>13</sup>C).
- 410 **Supplemental Figure S8.** NMR spectra of Pi-CerPE D (CDCl<sub>3</sub>-CD<sub>3</sub>OD 4:1, 600 MHz  
411 for <sup>1</sup>H, 150 MHz for <sup>13</sup>C).
- 412 **Supplemental Figure S9.** NMR spectra of Pi-CerPE D (CDCl<sub>3</sub>-CD<sub>3</sub>OD 4:1, 600 MHz  
413 for <sup>1</sup>H, 150 MHz for <sup>13</sup>C).
- 414 **Supplemental Figure S10.** MS/MS fragmentation of Pi-Cer A (precursor ion: [M +  
415 Na]<sup>+</sup>).
- 416 **Supplemental Figure S11.** Two-dimensional NMR correlations of Pi-Cer B (thick  
417 bonds: DQF-COSY, curved arrows: HMBC, l + m =15).
- 418 **Supplemental Figure S12.** MS/MS fragmentation of Pi-Cer B (precursor ion: [M +  
419 Na]<sup>+</sup>).
- 420 **Supplemental Figure S13.** Two-dimensional NMR correlations of Pi-Cer B (thick  
421 bonds: DQF-COSY, curved arrows: HMBC, l + m + n = 19).
- 422 **Supplemental Figure S14.** DQF-COSY (thick bonds), HMBC (curved arrows), and  
423 NOESY (dashed curves) correlations of Pi-Cer D.
- 424 **Supplemental Figure S15.** Linked-scan FAB MS/MS (negative ion mode) of the fatty  
425 acid derived from Pi-Cer D by acid hydrolysis.
- 426 **Supplemental Figure S16.** DQF-COSY (thick bonds) and HMBC (curved arrows)  
427 correlations of Pi-CerPE D.

428 **Supplemental Figure S17.** Ceramide phosphoethanolamine (Pi-CerPE) elicitors  
429 purified from methanol extract of *P. infestans* mycelia (Pi-MEM), which can induce the  
430 production of reactive oxygen species (ROS) in potato suspension-cultured cells.

431 **Supplemental Figure S18.** Pi-Cer contents in mycelia of oomycete and fungal plant  
432 pathogens.

433 **Supplemental Figure S19.** Induction of reactive oxygen species (ROS) production by  
434 Pi-Cer D and Pi-CerPE D treatment in potato suspension-culture cells.

435 **Supplemental Figure S20.** Production of phytoalexins in potato tuber is not induced by  
436 Pi-Cers and Pi-CerPEs.

437 **Supplemental Figure S21.** Purification procedure of *Phytophthora infestans*  
438 diacylglycerol (Pi-DAG) elicitors.

439 **Supplemental Figure S22.** ESI-TOF MS of Pi-DAG A. NMR spectra of Pi-DAG A  
440 (CDCl<sub>3</sub>, 400 MHz for <sup>1</sup>H and 100 MHz for <sup>13</sup>C). Two-dimensional NMR of Pi-DAG A  
441 (CDCl<sub>3</sub>, 400 MHz). Determination of fatty acids of Pi-DAG A by MS/MS.

442 **Supplemental Figure S23.** <sup>1</sup>H NMR spectrum of Pi-DAG B (CDCl<sub>3</sub>, 400 MHz).  
443 Determination of fatty acids in Pi-DAG B by negative ion FAB MS

444 **Supplemental Figure S24.** NMR spectra of Pi-DAG C (CDCl<sub>3</sub>, 400 MHz for <sup>1</sup>H, 100  
445 MHz for <sup>13</sup>C). Determination of fatty acids in Pi-DAG C by positive ion ESI MS/MS.  
446 Confirmation of fatty acid linkage in Pi-DAG C.

447 **Supplemental Figure S25.** NMR spectra of Pi-DAG D (MeOD, 400 MHz for <sup>1</sup>H, 100  
448 MHz for <sup>13</sup>C). Determination of fatty acids in Pi-DAG D by hydrolysis followed by  
449 negative ion FAB MS and MS/MS analysis of two fatty acid products.

450 **Supplemental Figure S26.** Pi-DAG contents in mycelia of oomycete plant pathogens.

451 **Supplemental Figure S27.** Eicosapentaenoic acid (EPA) does not induce the  
452 production of reactive oxygen species (ROS) in potato leaves.

453

454 **LITERATURE CITED**

- 455 **Bostock RM, Kuć JA, Laine RA** (1981). Eicosapentaenoic and arachidonic acids from  
456 *Phytophthora infestans* elicit fungitoxic sesquiterpenes in the potato. *Science* **212**:  
457 67–69
- 458 **Bostock RM, Savchenko T, Lazarus C, Dehesh K** (2011) Eicosapolyenoic acids:  
459 novel MAMPs with reciprocal effect on oomycete-plant defense signaling networks.  
460 *Plant Signal Behav* **6**: 531–533
- 461 **Camagna M, Ojika M, Takemoto D** (2020) Detoxification of the solanaceous  
462 phytoalexins rishitin, lubimin, oxylubimin and solavetivone via a cytochrome P450  
463 oxygenase. *Plant Signal Behav* **15**: 1707348
- 464 **Forbes GA** (2012) Using host resistance to manage potato late blight with particular  
465 reference to developing countries. *Potato Res* **55**: 205–216
- 466 **Free SJ** (2013) Fungal cell wall organization and biosynthesis. *Adv Genet* **81**: 33–82
- 467 **Fry W** (2008) *Phytophthora infestans*: the plant (and *R* gene) destroyer. *Mol Plant*  
468 *Pathol* **9**: 385–402
- 469 **Garelik G** (2002) Agriculture. Taking the bite out of potato blight. *Science* **298**:1702–  
470 1704
- 471 **Gaulin E, Bottin A, Dumas B** (2010) Sterol biosynthesis in oomycete pathogens. *Plant*  
472 *Signal Behav* **5**:258–260
- 473 **Ishida N, Akai S** (1969) Relation of temperature to germination of conidia and  
474 appressorium formation in *Colletotrichum lagenarium*. *Mycologia* **61**: 382–386
- 475 **Kamoun S, Furzer O, Jones JD, Judelson HS, Ali GS, Dalio RJ, Roy SG, Schena L,**  
476 **Zambounis A, Panabières F, Cahill D, Ruocco M, Figueiredo A, Chen XR,**  
477 **Hulvey J, Stam R, Lamour K, Gijzen M, Tyler BM, Grünwald NJ, Mukhtar MS,**

- 478 **Tomé DF, Tör M, Van Den Ackerveken G, McDowell J, Daayf F, Fry WE,**  
479 **Lindqvist-Kreuze H, Meijer HJ, Petre B, Ristaino J, Yoshida K, Birch PR,**  
480 **Govers F** (2015) The top 10 oomycete pathogens in molecular plant pathology. *Mol*  
481 *Plant Pathol* **16**: 413–434
- 482 **Kato H, Nemoto K, Shimizu M, Abe A, Asai S, Ishihama N, Daimon T, Ojika M,**  
483 **Kawakita K, Onai K, Shirasu K, Ishiura M, Takemoto D, Takano Y, Terauchi R**  
484 (2021) Pathogen-derived 9-methyl sphingoid base is perceived by a lectin receptor  
485 kinase in Arabidopsis. *bioRxiv*.
- 486 **Koga J, Yamauchi T, Shimura M, Ogawa N, Oshima K, Umemura K, Kikuchi M,**  
487 **Ogasawara N** (1998) Cerebrosides A and C, sphingolipid elicitors of hypersensitive  
488 cell death and phytoalexin accumulation in rice plants. *J Biol Chem* **273**: 31985–  
489 31991
- 490 **Kim D, Paggi JM, Park C, Bennett C, Salzberg SL** (2019) Graph-based genome  
491 alignment and genotyping with HISAT2 and HISAT-genotype. *Nat Biotechnol* **37**:  
492 907–915
- 493 **Kovaka S, Zimin AV, Pertea GM, Razaghi R, Salzberg SL, Pertea M** (2019)  
494 Transcriptome assembly from long-read RNA-seq alignments with StringTie2.  
495 *Genome Biol* **20**: 278
- 496 **Love MI, Huber W, Anders S** (2014) Moderated estimation of fold change and  
497 dispersion for RNA-seq data with DESeq2. *Genome Biol* **15**: 550
- 498 **Martin M** (2011) Cutadapt removes adapter sequences from high-throughput  
499 sequencing reads. *EMBnet J* **17**: 10–12

- 500 **Mélida H, Sandoval-Sierra JV, Diéguez-Uribeondo J, Bulone V** (2013) Analyses of  
501 extracellular carbohydrates in oomycetes unveil the existence of three different cell  
502 wall types. *Eukaryot Cell* **12**: 194–203
- 503 **Monjil MS, Nozawa T, Shibata Y, Takemoto D, Ojika M, Kawakita K** (2015)  
504 Methanol extract of mycelia from *Phytophthora infestans*-induced resistance in  
505 potato. *C R Biol* **338**: 185–196
- 506 **Namiki F, Shiomi T, Nishi K, Kayamura T, Tsuge T** (1998) Pathogenic and genetic  
507 variation in the Japanese strains of *Fusarium oxysporum* f. sp. *melonis*.  
508 *Phytopathology* **88**: 804–810
- 509 **Noritake T, Kawakita K, Doke N** (1996) Nitric oxide induces phytoalexin  
510 accumulation in potato tuber tissues. *Plant Cell Physiol* **37**: 113–116
- 511 **Ranf S** (2017) Sensing of molecular patterns through cell surface immune receptors.  
512 *Curr Opin Plant Biol* **38**: 68–77
- 513 **Shibata Y, Kawakita K, Takemoto D** (2010) Age-related resistance of *Nicotiana*  
514 *benthamiana* against hemibiotrophic pathogen *Phytophthora infestans* requires both  
515 ethylene- and salicylic acid-mediated signaling pathways. *Mol Plant-Microbe*  
516 *Interact* **23**: 1130–1142
- 517 **Shibata Y, Kawakita K, Takemoto D** (2011) SGT1 and HSP90 are essential for age-  
518 related non-host resistance of *Nicotiana benthamiana* against the oomycete pathogen  
519 *Phytophthora infestans*. *Physiol Mol Plant Pathol* **75**:120–128
- 520 **Sperling P, Heinz E** (2003) Plant sphingolipids: structural diversity, biosynthesis, first  
521 genes and functions. *Biochim Biophys Acta* **1632**: 1–15

- 522 **Thines M, Kamoun S** (2010) Oomycete-plant coevolution: recent advances and future  
523 prospects. *Curr Opin Plant Biol* **13**: 427–433
- 524 **Waskom ML** (2021) Seaborn: statistical data visualization. *J. Open Res. Softw* **6**: 3021

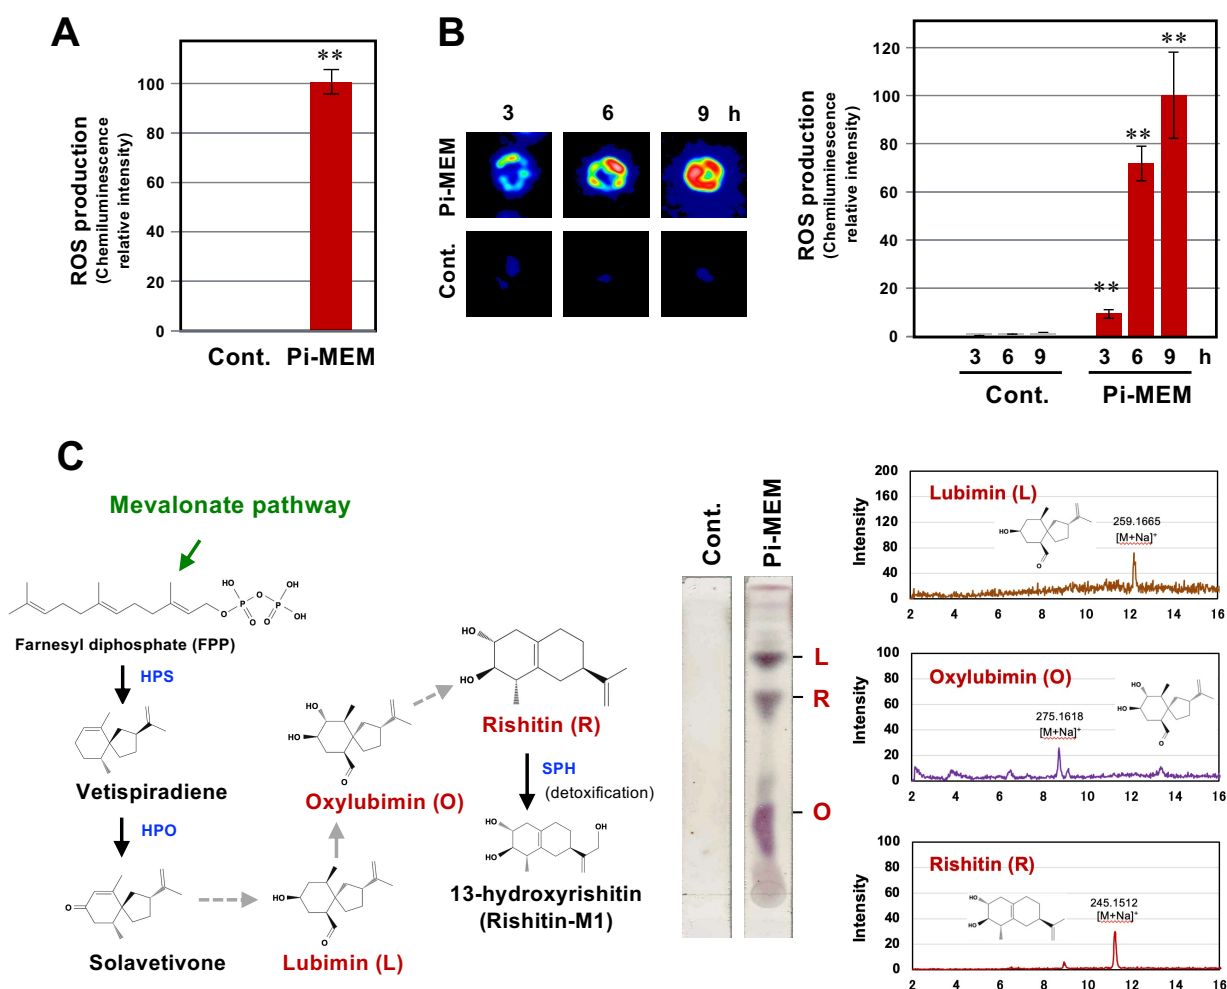

**Figure 1.** Elicitor activity of methanol extract of *Phytophthora infestans* mycelia (Pi-MEM) in potato.

(A) Potato suspension cultured cells were treated with 0.3% DMSO (Cont.) or 30 µg/ml Pi-MEM and production of reactive oxygen species (ROS) was detected as L-012-mediated chemiluminescence 3 h after the treatment. Data are means ± SE (n = 3). (B) Potato leaves were treated with 1 % DMSO (Cont.) or 100 µg/ml Pi-MEM and production of ROS was detected as L-012-mediated chemiluminescence. Data are means ± SE (n = 3). Data marked with asterisks are significantly different from control as assessed by two-tailed Student's *t* tests: \*\*P < 0.01. (C) Left, putative biosynthetic pathway of potato phytoalexins, lubimin, oxylubimin and rishitin. HPS, *Hyoscyamus muticus* premnaspirodiene synthase; HPO *H. muticus* premnaspirodiene oxygenase; SPH, sesquiterpenoid phytoalexins hydroxylase (Camagna et al., 2020). Potato tubers were treated with 3 % DMSO (Cont.) or 1 mg/ml Pi-MEM and phytoalexins were extracted 48 h after treatment. Produced phytoalexins were detected by thin-layer chromatography (middle) or LC/MS (right).



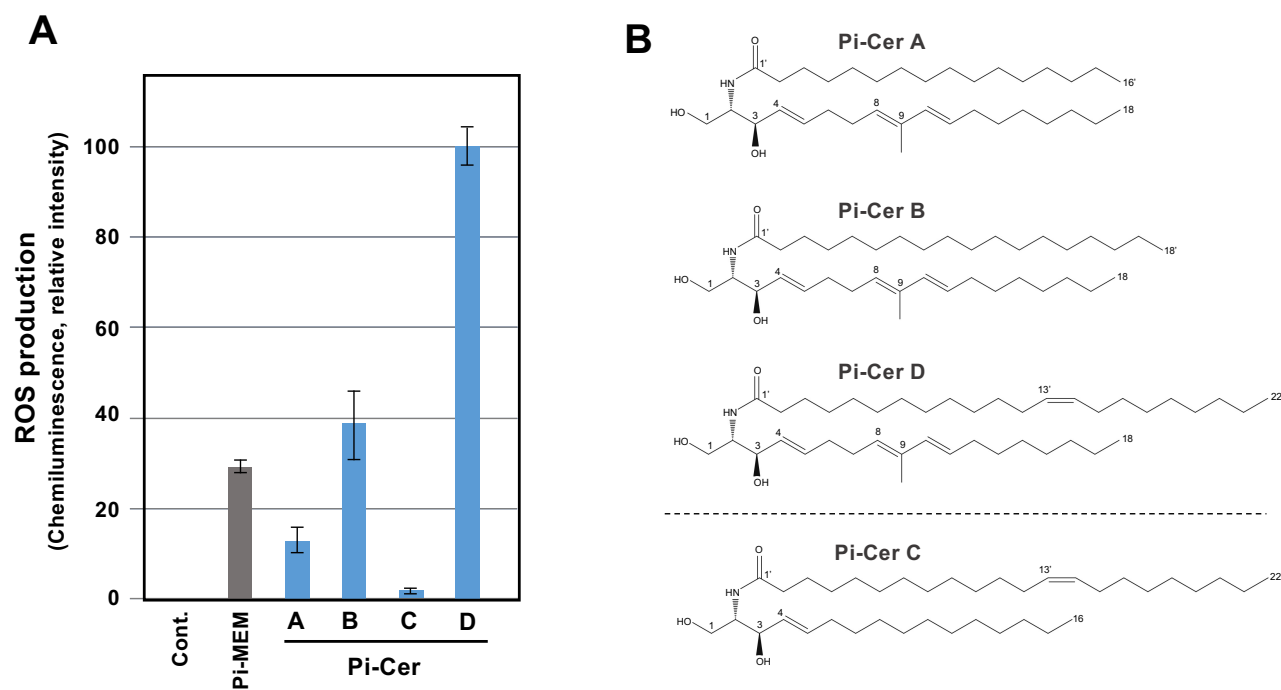

**Figure 2.** *Phytophthora infestans* ceramide elicitors (Pi-Cer) can induce the production of reactive oxygen species (ROS) in potato suspension cultured cells. **(A)** Potato suspension cultured cells were treated with 0.3% DMSO (Cont.), 30  $\mu\text{g/ml}$  methanol extract of *P. infestans* mycelia (PiMEM), 3  $\mu\text{g/ml}$  Pi-Cer A, B, C or D and production of ROS was detected as L-012 mediated chemiluminescence 3 h after the treatment. **(B)** Structures of Pi-Cer A, B, C and D. See Supplemental Figure S1 for the procedures of purification of elicitors and Supplemental Figures S2-5, S10-15 and supplemental document for details of their structural analysis.

## A Potato

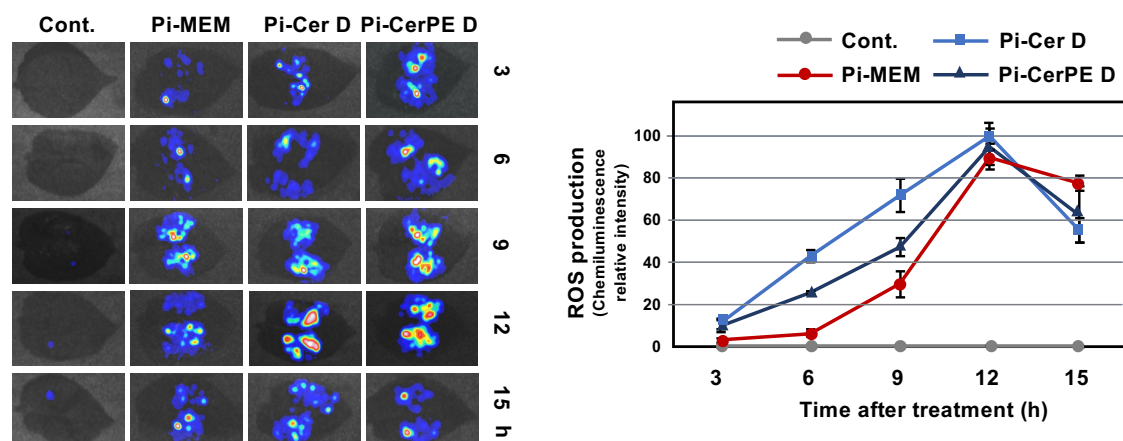

## B Arabidopsis

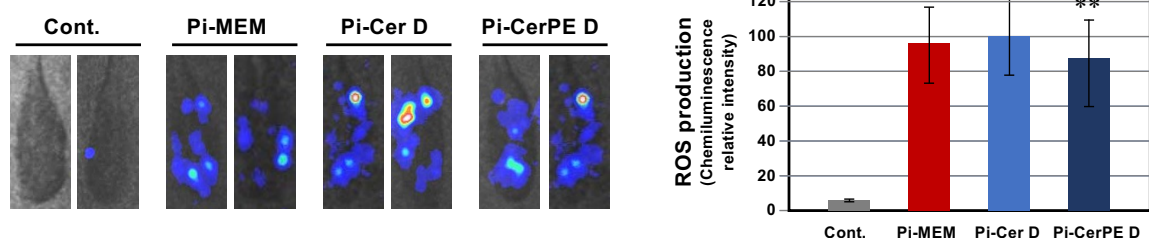

## C Rice

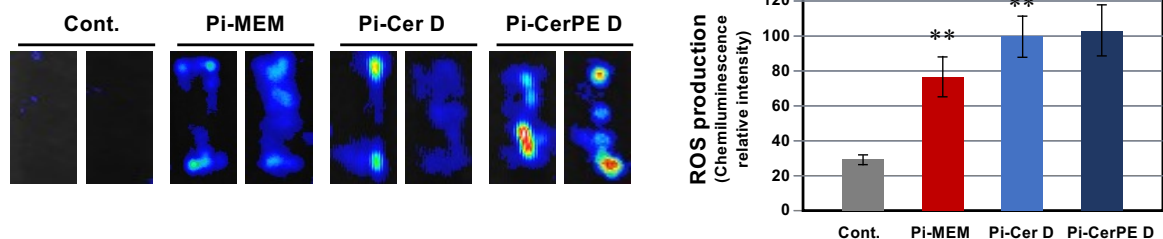

**Figure 3.** Pi-Cer D and Pi-CerPE D can induce the production of reactive oxygen species (ROS) in different plant species.

(A) (Left) Potato leaves were treated with 1% DMSO (Cont.), 100  $\mu$ g/ml methanol extract of *P. infestans* mycelia (Pi-MEM), 10  $\mu$ g/ml Pi-Cer D or Pi-CerPE D by syringe infiltration, and production of ROS was detected as L-012 mediated chemiluminescence 3-15 h after the treatment. Data are means  $\pm$  SE (n = 3).

(B) (Left) *Arabidopsis thaliana* leaves were treated with 1% DMSO (Cont.), 100  $\mu$ g/ml methanol extract of *P. infestans* (Pi-MEM), 10  $\mu$ g/ml Pi-Cer D or Pi-CerPE D by syringe infiltration, and production of ROS was detected as L-012 mediated chemiluminescence 12 h after the treatment. Data are means  $\pm$  SE (n = 3).

(C) (Left) Rice leaves were treated with 1% DMSO (Cont.), 100  $\mu$ g/ml methanol extract of *P. infestans* (Pi-MEM), 10  $\mu$ g/ml Pi-Cer D or Pi-CerPE D by vacuum infiltration, and production of ROS was detected as L-012 mediated chemiluminescence 12 h after the treatment. Data are means  $\pm$  SE (n = 3). Data marked with asterisks are significantly different from control as assessed by two-tailed Student's *t* tests: \*\*P < 0.01.

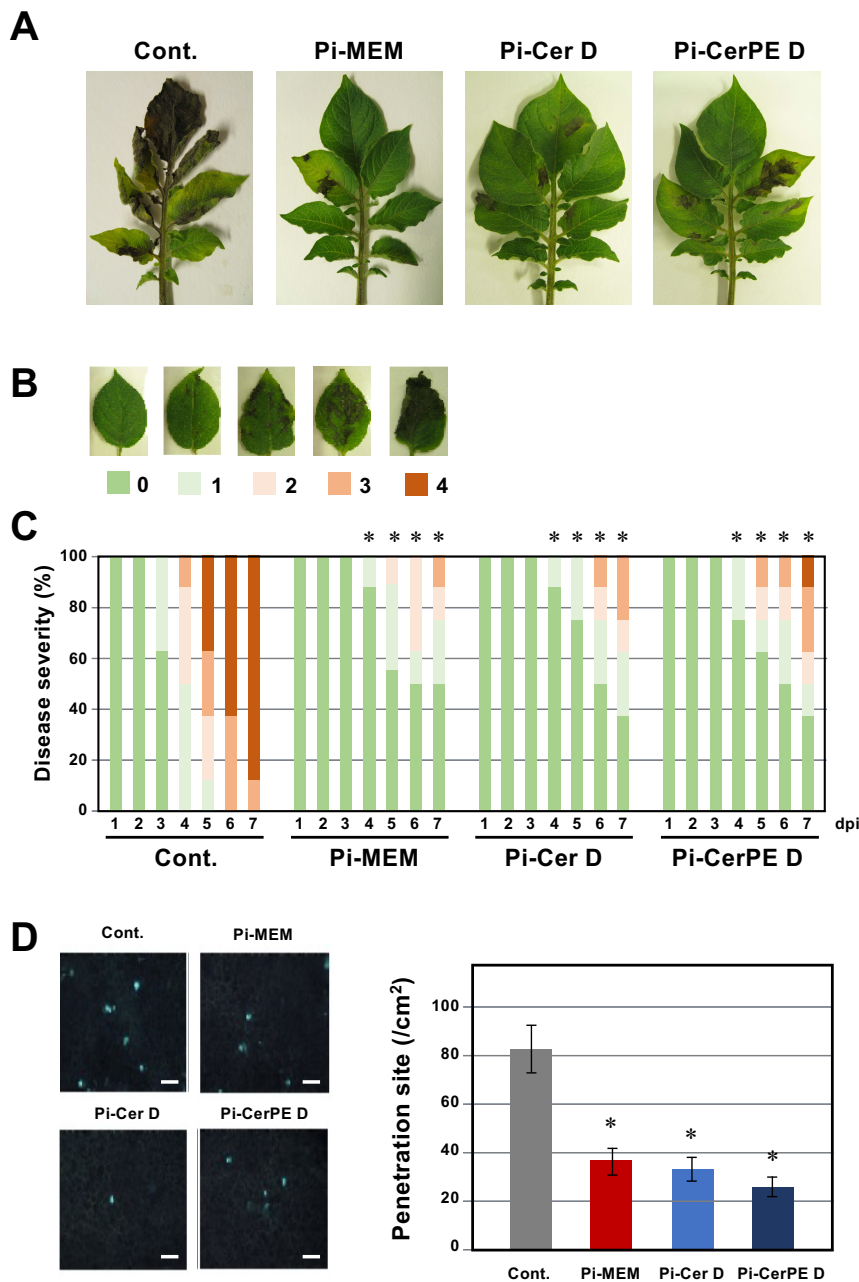

**Figure 4.** Pretreatment with Pi-Cer D and Pi-CerPE D enhances the resistance of potato leaves against *P. infestans*.

Potato leaves were treated with 0.5 % DMSO (control), 100  $\mu\text{g/ml}$  Pi-MEM, 10  $\mu\text{g/ml}$  Pi-Cer D or Pi-CerPE D and incubated for 24 hrs, and inoculated with a spore suspension of *P. infestans*. **(A)** Disease symptoms of *P. infestans* on potato leaves treated with DMSO, Pi-MEM, Pi-Cer D or Pi-CerPE D. Photographs were taken 6 days post inoculation. **(B)** Leaves representative of the disease severities used for classification. **(C)** Plots showing percentages of potato leaves with disease symptom severities using the classification depicted in (B). Leaves were pretreated with DMSO or elicitors, and disease severity of a subsequent *P. infestans* inoculation was observed from 1 - 7 days post inoculation (dpi). (n = 8). Data marked with asterisks are significantly different from control as assessed by one-tailed Mann–Whitney U-tests: \*P < 0.05. **(D)** Left, Penetration sites of *P. infestans* in elicitor treated leaf-discs were detected as callose depositions by aniline blue staining 24 h after inoculation. Bars = 50  $\mu\text{m}$ . Right, Number of fluorescent spots were counted in elicitor-treated leaf discs inoculated with *P. infestans* 24 hrs after inoculation. Data are means  $\pm$  SE (n = 3). Data marked with asterisks are significantly different from control as assessed by two-tailed Student's *t* tests: p < 0.01.

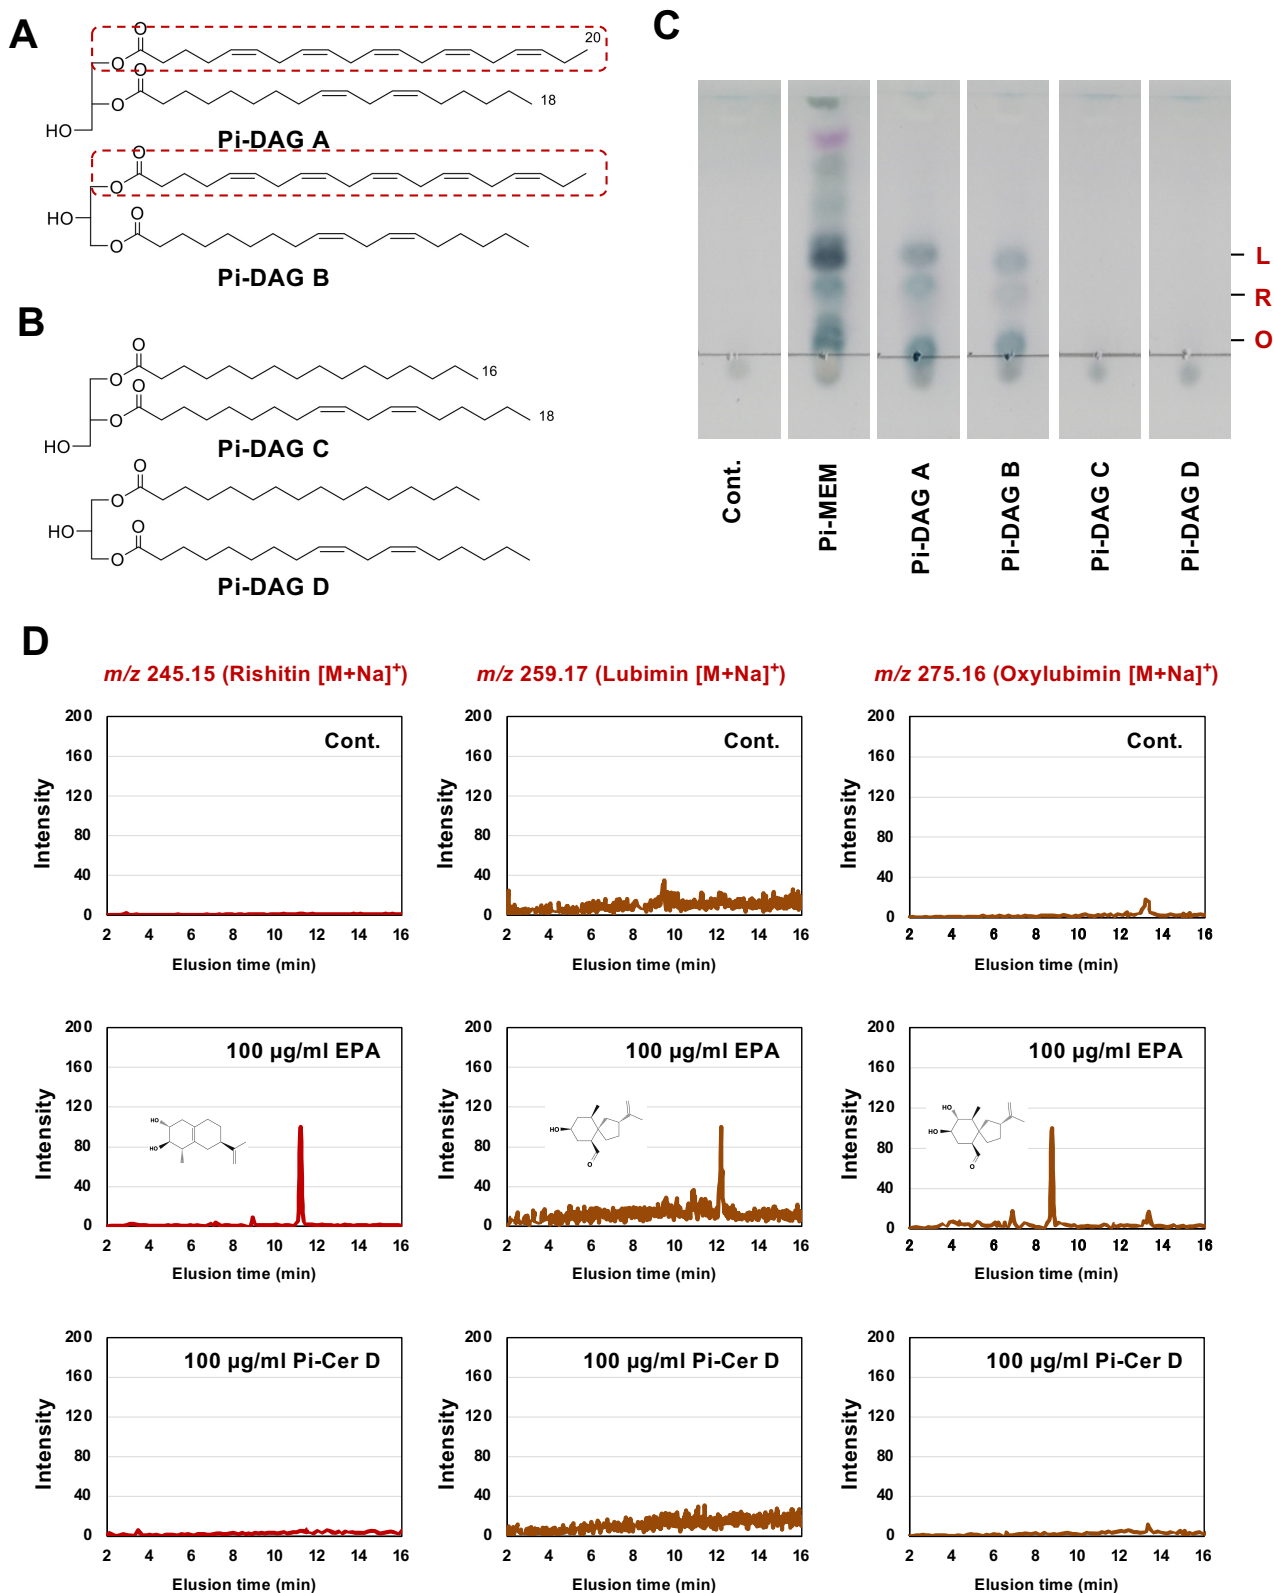

**Figure 5.** *Phytophthora infestans* diacylglycerol (Pi-DAG) induce the production of phytoalexins in potato tubers. **(A)** Structures of Pi-DAG A and B. Structures equivalent to eicosapentaenoic acid (EPA) are shown in red, dotted boxes. **(B)** Structures of Pi-DAG C and D which have significantly weaker elicitor activity compared with Pi-DAG A and B. See Supplemental Figure S22 for the procedures of purification of Pi-DAGs and Supplemental Figures S23-26 for their structural analysis. **(C)** Potato tubers were treated with 0.3% DMSO (Cont.), 30 µg/ml methanol extract of *P. infestans* mycelium (Pi-MEM), or 100 µg/ml Pi-DAGs, and production of phytoalexins was detected by thin-layer chromatography. L, Lubimin; R, Rishitin; O, Oxylubimin. **(D)** EPA, but not Pi-Cer D, can induce the production of phytoalexins in potato tubers. Potato tubers were treated with 0.3% DMSO (Cont.), 100 µg/ml EPA or 100 µg/ml Pi-Cer D and produced phytoalexins were detected by LC/MS.

**A**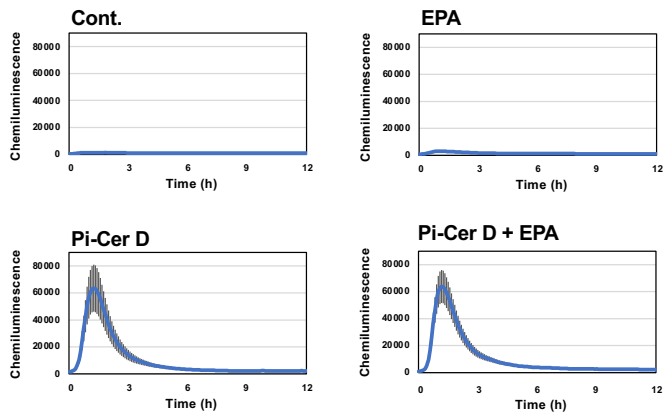**B**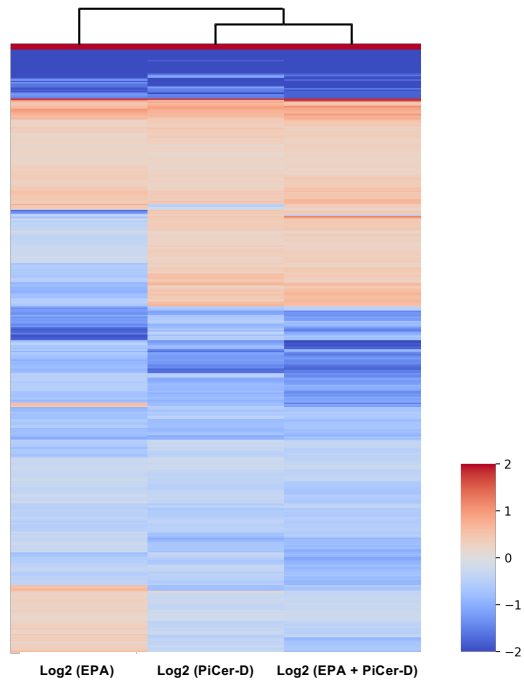

**Figure. 6** Distinctive sets of Arabidopsis genes were upregulated by the treatment with EPA and Pi-Cer D. **(A)** Arabidopsis transformant pWRKY33-LUC containing *LUC* transgene under the control of *AtWRKY33* (AT2G38470.1) promoter was treated with 20  $\mu\text{g/ml}$  EPA, Pi-Cer D or a mixture of 20  $\mu\text{g/ml}$  EPA and Pi-Cer D. Chemiluminescence was monitored for 12 h after the treatment. **(B)** Expression profile of Arabidopsis genes treated with 20  $\mu\text{g/ml}$  EPA, Pi-Cer D or a mixture of 20  $\mu\text{g/ml}$  EPA and Pi-Cer D. RNAseq analysis was performed 24 h after the treatment.
